# Supplementary material for: Efficient separation of rare earths recovered by a supported ionic liquid from bauxite residue leachate
Source: PubMed Central journal article supplement — RSC Adv. 2018 Mar 26;8(22):11886–93. doi: 10.1039/c7ra13402a (PMC9079289; doi:10.1039/c7ra13402a), 2018-03-26
Supplement: RA-008-C7RA13402A-s001.pdf [file RA-008-C7RA13402A-s001.pdf]

Electronic Supporting Information (ESI)

## **Efficient separation of rare earths recovered by a supported ionic liquid from bauxite residue leachate**

**Dženita Avdibegović, Mercedes Regadío, Koen Binnemans \***

### Table of contents

|                                                                                                                                                                                |   |
|--------------------------------------------------------------------------------------------------------------------------------------------------------------------------------|---|
| <b>S1. EQUATIONS</b> .....                                                                                                                                                     | 2 |
| Table S1 Separation factors between REEs and Sc(III) from equimolar solutions at $\text{pH}_{\text{eq}} \approx 2.6$ in the batch experiments. ....                            | 2 |
| Table S2 Separation factors between REEs at $\text{pH}_{\text{eq}} \approx 2.6$ in the batch mode. ....                                                                        | 2 |
| Table S4 Summary of Sc(III) quantity and purity in fractions after purification by the SILP from a 10 mL of equimolar solution ( $\text{pH}_{\text{ini}} = 1.5$ ). ....        | 4 |
| Table S5 Summary of Nd(III) quantity and purity in fractions after purification by the SILP from 10 mL of equimolar solution ( $\text{pH}_{\text{ini}} = 1.5$ ). ....          | 5 |
| Table S6 Summary of Dy(III) and Y(III) quantity and purity in fractions after purification by the SILP from 10 mL of equimolar solution ( $\text{pH}_{\text{ini}}=1.5$ ). .... | 6 |
| Table S7 Summary of REEs quantity and purity in fractions collected after purification by the SILP from 2 mL of real BR leachate. ....                                         | 7 |

## S1. EQUATIONS

Space velocity,  $SV$ :

$$SV = \frac{Q}{BV} \quad (\text{eq S1})$$

where  $Q$  is the volumetric flow rate ( $\text{mL h}^{-1}$ ) and  $BV$  is the bed volume ( $\text{mL}$ ), regarded as the total volume of the SILP together with the void volume in the column.

**Table S1** Separation factors between REEs and Sc(III) from equimolar solutions at  $\text{pH}_{\text{eq}} \approx 2.6$  in the batch experiments.

|               | Y(III)/Sc(III) | Nd(III)/Sc(III) | Dy(III)/Sc(III) |
|---------------|----------------|-----------------|-----------------|
| Nitrate media | 1.3            | 1.2             | 1.1             |
| Sulfate media | 4.2            | 3.4             | 3.6             |

**Table S2** Separation factors between REEs at  $\text{pH}_{\text{eq}} \approx 2.6$  in the batch mode.

|               | Y(III)/Nd(III) | Dy(III)/Nd(III) | Y(III)/Dy(III) |
|---------------|----------------|-----------------|----------------|
| Nitrate media | 1.1            | 1.3*            | 1.5            |
| Sulfate media | 1.2            | 1.1             | 1.2            |

\*The value represents the Nd(III)/Dy(III) separation factor.

**Table S3** Summary of bed volumes ( $BV$ ) and adsorption capacities  $q_{0.05}$  and  $q$  at breakthrough and exhaustive point, respectively: a) nitrate feed at  $0.5 \text{ mL min}^{-1}$  ( $SV = 2.7 \text{ h}^{-1}$ ), b) nitrate feed at  $2.0 \text{ mL min}^{-1}$  ( $SV = 10.8 \text{ h}^{-1}$ ) and c) sulfate feed at  $0.5 \text{ mL min}^{-1}$  ( $SV = 2.7 \text{ h}^{-1}$ ).

|         | $BV$ (mL) at<br>$c/c_0 = 0.05$ |      |      | $BV$ (mL) at<br>$c/c_0 = 1$ |      |      | $q_{0.05}$ (mmol $\text{g}^{-1}$ ) |       |       | $q$ (mmol $\text{g}^{-1}$ ) |       |       | $q_{0.05}/q$ |       |       |
|---------|--------------------------------|------|------|-----------------------------|------|------|------------------------------------|-------|-------|-----------------------------|-------|-------|--------------|-------|-------|
|         | a                              | b    | c    | a                           | b    | c    | a                                  | b     | c     | a                           | b     | c     | a            | b     | c     |
| Ca(III) | 4.64                           | 5.57 | 4.64 | 5.57                        | 6.04 | 5.11 | 0.047                              | 0.057 | 0.042 | 0.051                       | 0.062 | 0.045 | 0.918        | 0.919 | 0.921 |
| Al(III) | 5.11                           | 5.57 | 5.57 | 6.04                        | 6.96 | 7.43 | 0.035                              | 0.046 | 0.042 | 0.038                       | 0.050 | 0.050 | 0.929        | 0.923 | 0.841 |
| Fe(III) | 5.11                           | 6.04 | 4.18 | 6.04                        | 8.82 | 5.11 | 0.050                              | 0.057 | 0.045 | 0.054                       | 0.073 | 0.048 | 0.928        | 0.776 | 0.933 |
| Sc(III) | 5.57                           | 6.04 | 3.71 | 6.50                        | 8.36 | 4.18 | 0.045                              | 0.052 | 0.029 | 0.050                       | 0.064 | 0.029 | 0.892        | 0.821 | 1.000 |
| Y(III)  | 6.04                           | 6.04 | 5.57 | 8.36                        | 9.29 | 11.1 | 0.059                              | 0.066 | 0.057 | 0.070                       | 0.084 | 0.065 | 0.846        | 0.779 | 0.888 |
| Dy(III) | 6.04                           | 6.04 | 5.57 | 8.82                        | 10.2 | 6.50 | 0.051                              | 0.046 | 0.050 | 0.058                       | 0.060 | 0.057 | 0.887        | 0.766 | 0.880 |
| Nd(III) | 6.50                           | 6.50 | 5.57 | 11.6                        | 12.1 | 11.1 | 0.058                              | 0.058 | 0.044 | 0.081                       | 0.085 | 0.054 | 0.711        | 0.686 | 0.811 |

$\text{pH}_{\text{ini}} = 1.5$ ,  $\text{pH}_{\text{eq}}$  ranges from 1.2 to 1.5. Adsorption capacities were calculated using eq 1.

**Table S4** Summary of Sc(III) quantity and purity in fractions after purification by the SILP from a 10.0 mL of equimolar solution ( $\text{pH}_{\text{ini}} = 1.5$ ).

| Sc (mg)                                                                                                                  | Impurities (wt%) |      |      | V (mL) $\text{H}_3\text{PO}_4$ | Ordinal number of fractions | BV        |
|--------------------------------------------------------------------------------------------------------------------------|------------------|------|------|--------------------------------|-----------------------------|-----------|
|                                                                                                                          | Fe               | Al   | Ca   |                                |                             |           |
| Eluent: $\text{H}_3\text{PO}_4 - 0.5 \text{ mL min}^{-1} - \text{nitrate media}$                                         |                  |      |      |                                |                             |           |
| 0.065                                                                                                                    | 0.00             | 0.00 | 0.00 | 25.0                           | 3–7                         | 1.39–3.25 |
| 0.353                                                                                                                    | 15.3             | 0.00 | 0.00 | 5.00                           | 8                           | 3.71      |
| 0.020                                                                                                                    | 95.3             | 0.00 | 0.00 | 15.0                           | 9–11                        | 4.18–5.11 |
| Eluents: $\text{H}_3\text{PO}_4 - \text{HNO}_3 - 0.5 \text{ mL min}^{-1} - \text{nitrate media}$                         |                  |      |      |                                |                             |           |
| 0.072                                                                                                                    | 0.00             | 0.00 | 0.00 | 30.0                           | 3–8                         | 1.39–3.71 |
| 0.377                                                                                                                    | 13.1             | 0.00 | 0.00 | 5.00                           | 9                           | 4.18      |
| 0.018                                                                                                                    | 96.2             | 0.00 | 0.00 | 20.0                           | 10–11                       | 4.64–5.11 |
| Eluents: $\text{H}_3\text{PO}_4 - \text{HNO}_3 - \text{H}_3\text{PO}_4 - 0.5 \text{ mL min}^{-1} - \text{nitrate media}$ |                  |      |      |                                |                             |           |
| 0.062                                                                                                                    | 6.46             | 0.00 | 0.00 | 25.0                           | 3–7                         | 1.39–3.25 |
| 0.377                                                                                                                    | 17.5             | 0.00 | 0.00 | 5.00                           | 8                           | 3.71      |
| 0.017                                                                                                                    | 96.0             | 0.00 | 0.00 | 15.0                           | 9–11                        | 4.18–5.11 |
| Eluents: $\text{H}_3\text{PO}_4 - \text{HNO}_3 - \text{H}_3\text{PO}_4 - 2.0 \text{ mL min}^{-1} - \text{nitrate media}$ |                  |      |      |                                |                             |           |
| 0.138                                                                                                                    | 0.00             | 0.00 | 0.00 | 30.0                           | 2–6                         | 0.93–2.79 |
| 0.061                                                                                                                    | 0.00             | 0.00 | 0.00 | 5.00                           | 7                           | 3.25      |
| 0.303                                                                                                                    | 61.5             | 0.00 | 0.00 | 15.0                           | 8–11                        | 3.71–5.11 |
| Eluents: $\text{H}_3\text{PO}_4 - \text{HNO}_3 - \text{H}_3\text{PO}_4 - 0.5 \text{ mL min}^{-1} - \text{sulfate media}$ |                  |      |      |                                |                             |           |
| 0.112                                                                                                                    | 0.00             | 0.22 | 0.73 | 30.0                           | 2–7                         | 0.93–3.25 |
| 0.301                                                                                                                    | 14.5             | 0.52 | 0.41 | 5.00                           | 8                           | 3.71      |
| 0.011                                                                                                                    | 95.5             | 1.09 | 0.00 | 10.0                           | 9–10                        | 4.18–4.64 |

Other REEs were not detected in the Sc(III) fractions.

**Table S5** Summary of Nd(III) quantity and purity in fractions after purification by the SILP from 10.0 mL of equimolar solution ( $\text{pH}_{\text{ini}} = 1.5$ ).

| Nd (mg)                                                                                                                  | Impurities (wt%) |      |      |      |      | $V$ (mL) $\text{H}_3\text{PO}_4$ | Ordinal number of fractions | $BV$      |
|--------------------------------------------------------------------------------------------------------------------------|------------------|------|------|------|------|----------------------------------|-----------------------------|-----------|
|                                                                                                                          | Al               | Ca   | Dy   | Fe   | Y    |                                  |                             |           |
| Eluent: $\text{H}_3\text{PO}_4 - 0.5 \text{ mL min}^{-1} - \text{nitrate media}$                                         |                  |      |      |      |      |                                  |                             |           |
| 0.082                                                                                                                    | 0.00             | 6.71 | 44.4 | 2.89 | 38.0 | 4.50                             | 22                          | 10.2      |
| 1.348                                                                                                                    | 0.00             | 1.99 | 10.7 | 0.59 | 12.7 | 13.5                             | 23–25                       | 10.7–11.6 |
| 0.012                                                                                                                    | 0.00             | 38.2 | 0.00 | 0.00 | 0.00 | 13.5                             | 26–28                       | 12.0–13.0 |
| Eluents: $\text{H}_3\text{PO}_4 - \text{HNO}_3 - 0.5 \text{ mL min}^{-1} - \text{nitrate media}$                         |                  |      |      |      |      |                                  |                             |           |
| 0.088                                                                                                                    | 41.5             | 0.62 | 29.4 | 1.87 | 11.3 | 5.00                             | 24                          | 11.1      |
| 1.443                                                                                                                    | 0.62             | 1.54 | 37.7 | 2.14 | 26.1 | 15.0                             | 25–27                       | 11.6–12.5 |
| 0.041                                                                                                                    | 0.00             | 4.29 | 24.1 | 0.00 | 30.8 | 15.0                             | 28–30                       | 13.0–13.9 |
| Eluents: $\text{H}_3\text{PO}_4 - \text{HNO}_3 - \text{H}_3\text{PO}_4 - 0.5 \text{ mL min}^{-1} - \text{nitrate media}$ |                  |      |      |      |      |                                  |                             |           |
| 0.525                                                                                                                    | 0.00             | 2.18 | 48.5 | 3.21 | 29.6 | 18.0                             | 28–31                       | 13.0–14.4 |
| 0.738                                                                                                                    | 0.00             | 0.72 | 5.37 | 0.37 | 6.81 | 4.50                             | 32                          | 14.9      |
| 0.177                                                                                                                    | 0.00             | 1.99 | 1.84 | 0.16 | 1.73 | 22.5                             | 33–37                       | 15.3–17.2 |
| Eluents: $\text{H}_3\text{PO}_4 - \text{HNO}_3 - \text{H}_3\text{PO}_4 - 2 \text{ mL min}^{-1} - \text{nitrate media}$   |                  |      |      |      |      |                                  |                             |           |
| 0.500                                                                                                                    | 0.75             | 1.41 | 48.5 | 3.01 | 30.5 | 27.0                             | 26–31                       | 12.1–14.4 |
| 0.709                                                                                                                    | 0.00             | 1.60 | 34.2 | 2.31 | 29.9 | 4.50                             | 32                          | 14.7      |
| 0.472                                                                                                                    | 0.00             | 7.96 | 10.2 | 0.21 | 9.86 | 31.5                             | 33–39                       | 15.3–18.1 |
| Eluents: $\text{H}_3\text{PO}_4 - \text{HNO}_3 - \text{H}_3\text{PO}_4 - 0.5 \text{ mL min}^{-1} - \text{sulfate media}$ |                  |      |      |      |      |                                  |                             |           |
| 0.007                                                                                                                    | 0.00             | 1.92 | 65.2 | 5.01 | 27.2 | 9.00                             | 29–30                       | 13.5–13.9 |
| 0.592                                                                                                                    | 0.00             | 1.68 | 26.4 | 2.04 | 23.7 | 4.50                             | 31                          | 14.4      |
| 0.853                                                                                                                    | 2.31             | 0.78 | 3.74 | 0.22 | 3.94 | 27.0                             | 32–37                       | 14.7–17.2 |

Sc(III) was not detected in the Nd(III) fractions.

**Table S6** Summary of Dy(III) and Y(III) quantity and purity in fractions after purification by the SILP from 10.0 mL of equimolar solution ( $\text{pH}_{\text{ini}}=1.5$ ).

| Dy (mg)                                                                                                                  | Y (mg) | Impurities (wt%) |      |      |      | $V$ (mL) $\text{H}_3\text{PO}_4$ | Ordinal number of fractions | $BV$      |
|--------------------------------------------------------------------------------------------------------------------------|--------|------------------|------|------|------|----------------------------------|-----------------------------|-----------|
|                                                                                                                          |        | Al               | Ca   | Fe   | Nd   |                                  |                             |           |
| Eluent: $\text{H}_3\text{PO}_4 - 0.5 \text{ mL min}^{-1}$                                                                |        |                  |      |      |      |                                  |                             |           |
| 0.107                                                                                                                    | 0.019  | 0.00             | 14.3 | 4.26 | 0.00 | 4.50                             | 18                          | 8.36      |
| 1.215                                                                                                                    | 0.495  | 0.00             | 17.5 | 3.80 | 0.00 | 13.5                             | 19–21                       | 8.82–9.75 |
| 0.655                                                                                                                    | 0.624  | 0.00             | 3.70 | 1.42 | 50.1 | 18.0                             | 22–25                       | 10.2–11.6 |
| Eluents: $\text{H}_3\text{PO}_4 - \text{HNO}_3 - 0.5 \text{ mL min}^{-1}$                                                |        |                  |      |      |      |                                  |                             |           |
| 0.168                                                                                                                    | 0.065  | 41.5             | 0.62 | 1.87 | 15.4 | 5.00                             | 24                          | 11.1      |
| 1.701                                                                                                                    | 1.178  | 0.62             | 1.54 | 2.14 | 32.0 | 15.0                             | 25–27                       | 11.6–12.5 |
| 0.024                                                                                                                    | 0.031  | 0.00             | 4.29 | 0.00 | 40.8 | 15.0                             | 28–30                       | 13.0–13.9 |
| Eluents: $\text{H}_3\text{PO}_4 - \text{HNO}_3 - \text{H}_3\text{PO}_4 - 0.5 \text{ mL min}^{-1}$                        |        |                  |      |      |      |                                  |                             |           |
| 0.020                                                                                                                    | 0.003  | 26.9             | 2.30 | 10.8 | 0.00 | 4.50                             | 26                          | 12.1      |
| 1.431                                                                                                                    | 0.663  | 0.00             | 2.14 | 4.27 | 1.18 | 18.0                             | 27–30                       | 12.5–13.9 |
| 0.393                                                                                                                    | 0.406  | 0.00             | 1.45 | 1.14 | 62.1 | 18.0                             | 31–34                       | 14.4–15.8 |
| Eluents: $\text{H}_3\text{PO}_4 - \text{HNO}_3 - \text{H}_3\text{PO}_4 - 2 \text{ mL min}^{-1}$                          |        |                  |      |      |      |                                  |                             |           |
| 0.019                                                                                                                    | 0.005  | 78.2             | 0.00 | 0.22 | 0.00 | 4.50                             | 25                          | 11.6      |
| 1.086                                                                                                                    | 0.576  | 1.28             | 1.27 | 3.49 | 4.55 | 22.5                             | 26–30                       | 12.1–13.9 |
| 0.722                                                                                                                    | 0.666  | 0.00             | 2.82 | 1.44 | 51.0 | 27.0                             | 31–36                       | 14.4–16.7 |
| Eluents: $\text{H}_3\text{PO}_4 - \text{HNO}_3 - \text{H}_3\text{PO}_4 - 0.5 \text{ mL min}^{-1} - \text{sulfate media}$ |        |                  |      |      |      |                                  |                             |           |
| 0.020                                                                                                                    | 0.000  | 89.4             | 0.00 | 0.00 | 0.00 | 4.50                             | 25                          | 11.6      |
| 1.167                                                                                                                    | 0.399  | 0.72             | 1.63 | 5.23 | 0.40 | 22.5                             | 26–30                       | 12.1–13.9 |
| 0.374                                                                                                                    | 0.341  | 0.99             | 1.29 | 1.26 | 64.5 | 31.5                             | 31–37                       | 14.4–17.2 |

Sc(III) was not detected in Dy(III) and Y(III) fractions.

**Table S7** Summary of REEs quantity and purity in fractions collected after purification by the SILP from 2.0 mL of real BR leachate.

| REEs | <i>m</i><br>(mg) | Impurities (wt%) |      |      |      |      |      |      |      |      | <i>V</i><br>(mL)<br>H <sub>3</sub> PO <sub>4</sub> | Ordinal<br>nr. of<br>fraction | <i>BV</i> |
|------|------------------|------------------|------|------|------|------|------|------|------|------|----------------------------------------------------|-------------------------------|-----------|
|      |                  | Al               | Ca   | Dy   | Fe   | Nd   | Sc   | Si   | Ti   | Y    |                                                    |                               |           |
| Sc   | 0.007            | 4.25             | 63.8 | 0.00 | 24.0 | 0.00 | 0.27 | 1.18 | 6.48 | 0.00 | 30.0                                               | 1–6                           | 0.46–2.79 |
| Y    | 0.005            | 13.9             | 29.4 | 2.06 | 5.33 | 16.6 | 0.00 | 0.24 | 1.12 | 12.9 | 22.5                                               | 29–33                         | 13.5–15.3 |
| Dy   | 0.001            |                  |      |      |      |      |      |      |      |      |                                                    |                               |           |
| Nd   | 0.010            | 23.6             | 36.9 | 1.66 | 6.90 | 19.7 | 0.00 | 0.20 | 0.90 | 10.2 | 22.5                                               | 31–35                         | 14.4–16.2 |

Flow rate 0.5 mL min<sup>-1</sup>, pH<sub>ini</sub> = 1.2.
